# Supplementary material for: qtlXplorer: an online systems genetics browser in the Eucalyptus Genome Integrative Explorer (EucGenIE)
Source: PubMed Central journal article supplement (PMC8672637; doi:10.1186/s12859-021-04514-9), 2021-12-15

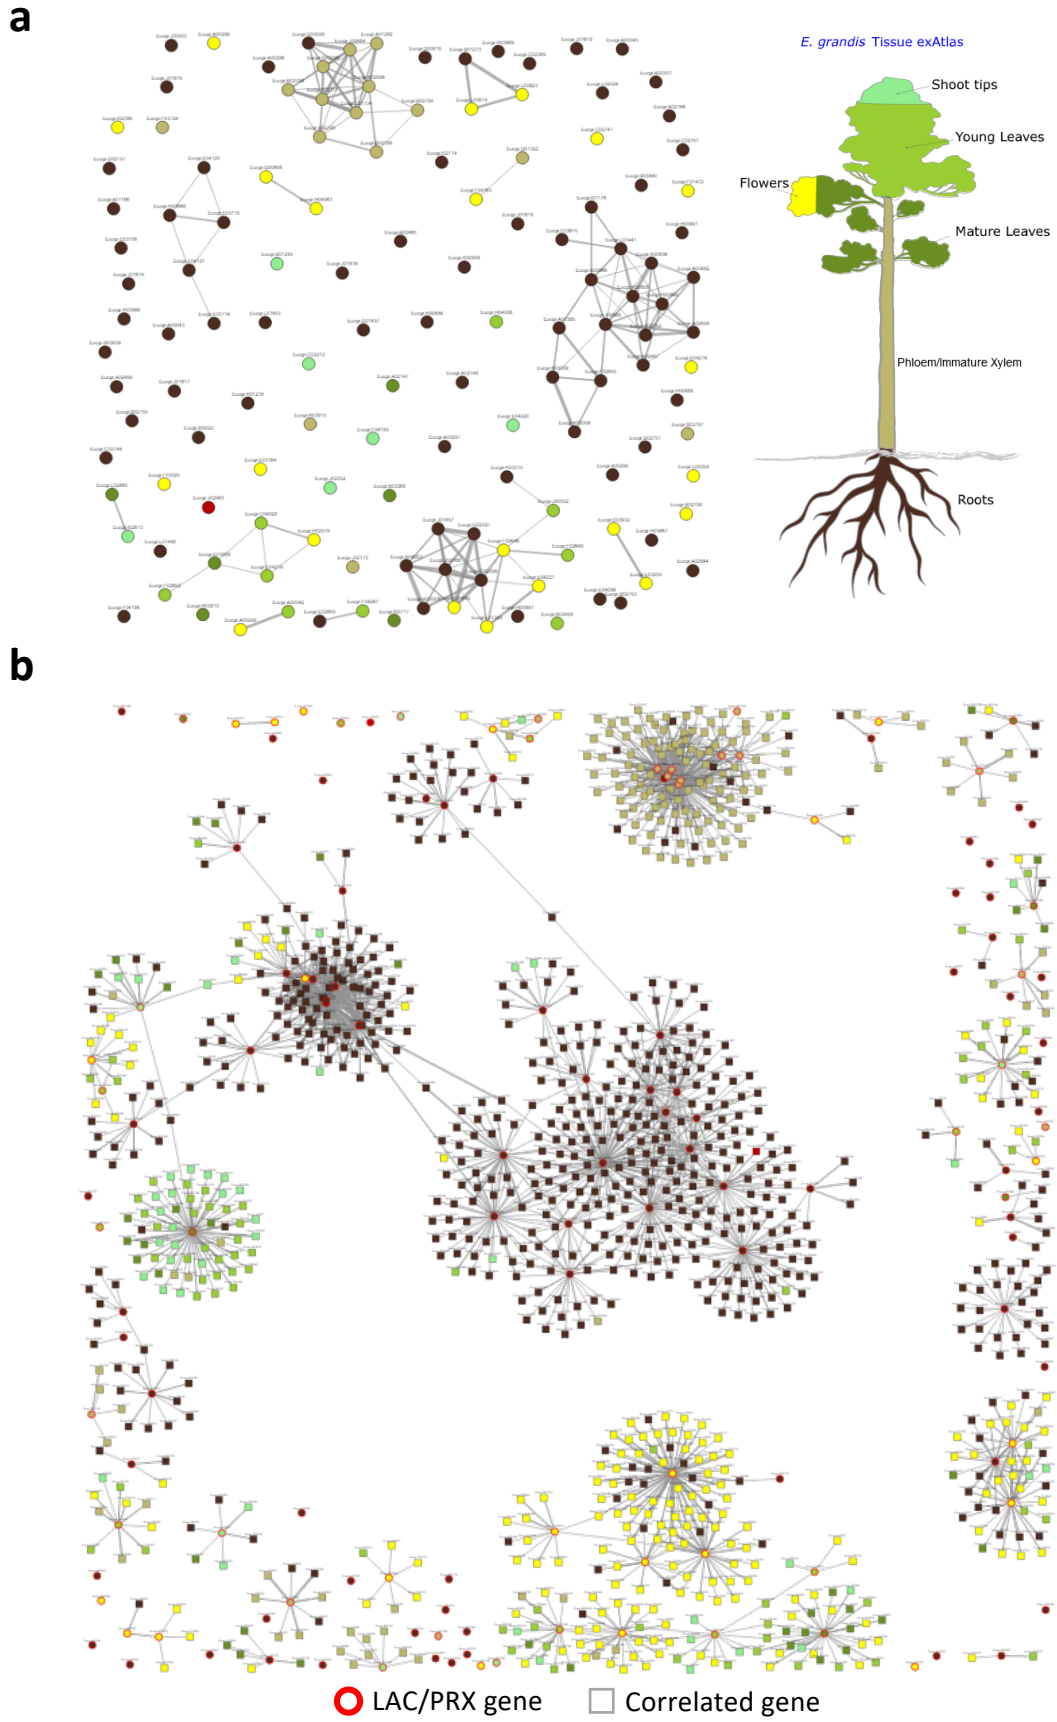

Supplement: 12859_2021_4514_MOESM3_ESM.pdf [file 12859_2021_4514_MOESM3_ESM.pdf]
